# Supplementary material
Source: publisher figshare collection journal article supplement (https://gsapubs.figshare.com/ndownloader/files/34638068)
Supplement: Supplementary file 1 [file 34638068]

## Sheet: 1) Boston
TABLE S1. GRANITOID AND VOLCANIC SAMPLES FROM SOUTHEASTERN NEW ENGLAND, USA
															176Lu/177Hf =	176Lu/177Hf =
															0.022	0.015
				CHUR	DM	Sample (present-day ratios)						Sample (initial ratios)			DM model ages (Ga)**
File Name		U-Pb Age	±2s	176Hf/177Hf	176Hf/177Hf	176Hf/177Hf	±2SE	176Lu/177Hf	±2SE	176Hf/177Hf	epsilon Hf	±2SE	epsilon Hf	±2SE	TDM	Felsic
		(Ma)		(t)	(t)					(t)	0		(t)			source
715-80-1 Esmond Granite: 599 +/- 2 (41.8705°N, 71.5614°W )*
715-80-1-g1		599	2	0.282407	0.282814	0.282422	2.87091e-05	0.00205242	3.00167e-05	0.282399	-12.8243	1.01653	-0.27854	1.01653	1.19961	1.52355
715-80-1-g2		599	2	0.282407	0.282814	0.282378	2.1098e-05	0.00187732	0.000121845	0.282357	-14.3899	0.747155	-1.77649	0.747155	1.25743	1.61704
715-80-1-g3		599	2	0.282407	0.282814	0.282442	2.70491e-05	0.00166743	6.70879e-06	0.282424	-12.1156	0.957687	0.584425	0.957687	1.15864	1.46962
715-80-1-g4		599	2	0.282407	0.282814	0.282414	1.98345e-05	0.00142068	6.07373e-05	0.282398	-13.1071	0.70232	-0.310113	0.70232	1.19078	1.52552
715-80-1-g5		599	2	0.282407	0.282814	0.282382	2.36211e-05	0.00225282	0.000170405	0.282357	-14.2476	0.836494	-1.78349	0.836494	1.26444	1.61748
715-80-1-g6		599	2	0.282407	0.282814	0.282416	2.58218e-05	0.00278868	0.000275689	0.282385	-13.041	0.914316	-0.788697	0.914316	1.233	1.55541
715-80-1-g7		599	2	0.282407	0.282814	0.282447	3.14261e-05	0.00217696	0.00020871	0.282423	-11.9352	1.11263	0.562213	1.11263	1.1673	1.471
715-80-1-g8		599	2	0.282407	0.282814	0.28242	1.974e-05	0.00318112	0.000185728	0.282384	-12.9152	0.698961	-0.818995	0.698961	1.24122	1.5573
715-80-1-g9		599	2	0.282407	0.282814	0.282427	3.28808e-05	0.00107005	6.03796e-05	0.282415	-12.649	1.16422	0.288261	1.16422	1.16158	1.48813
715-80-1-g10		599	2	0.282407	0.282814	0.282397	2.61034e-05	0.00187141	0.000161308	0.282376	-13.7141	0.924351	-1.0974	0.924351	1.22984	1.57468
715-80-1-g11		599	2	0.282407	0.282814	0.282497	2.83289e-05	0.00204371	0.000145393	0.282474	-10.1755	1.0028	2.37731	1.0028	1.09129	1.35739
715-80-1-g13		599	2	0.282407	0.282814	0.282416	2.45472e-05	0.0015337	4.02171e-05	0.282398	-13.0609	0.869188	-0.30883	0.869188	1.19252	1.52544
715-80-1-g14		599	2	0.282407	0.282814	0.282447	2.49968e-05	0.00168359	8.93563e-05	0.282428	-11.9617	0.885008	0.732094	0.885008	1.15293	1.46038
715-80-1-g15		599	2	0.282407	0.282814	0.282415	2.55717e-05	0.00179684	4.43461e-05	0.282395	-13.0767	0.905466	-0.4295	0.905466	1.20159	1.53298
715-80-1-g16		599	2	0.282407	0.282814	0.282415	2.10643e-05	0.00170691	7.279e-05	0.282396	-13.0691	0.745863	-0.386042	0.745863	1.19839	1.53027
715-80-1-g17		599	2	0.282407	0.282814	0.282379	1.95312e-05	0.00131785	3.37645e-05	0.282364	-14.3564	0.691666	-1.52009	0.691666	1.23744	1.60105
715-80-1-g18		599	2	0.282407	0.282814	0.2824	1.78706e-05	0.00186706	9.93245e-05	0.282379	-13.6288	0.632812	-1.01024	0.632812	1.22624	1.56924
715-80-1-g19		599	2	0.282407	0.282814	0.282419	2.19893e-05	0.00245806	9.93669e-05	0.282391	-12.9537	0.778605	-0.569647	0.778605	1.21826	1.54173
715-80-1-g20		599	2	0.282407	0.282814	0.282439	2.36727e-05	0.00183141	2.76332e-05	0.282419	-12.2214	0.838153	0.413222	0.838153	1.16804	1.48032
WEI-5 Dedham Granite: 608.9 +/- 1.2 (42.2667°N, 70.8722°W)*
WEI-5-g1		608.9	1.2	0.282401	0.282806	0.282451	1.76324e-05	0.000866472	4.70022e-05	0.282441	-11.8276	0.624263	1.40848	0.624263	1.12289	1.42581
WEI-5-g2		608.9	1.2	0.282401	0.282806	0.282509	2.58019e-05	0.00107879	9.357e-05	0.282497	-9.74267	0.913312	3.41033	0.913312	1.04621	1.30036
WEI-5-g3		608.9	1.2	0.282401	0.282806	0.282462	2.92943e-05	0.00148616	0.000118474	0.282445	-11.419	1.03711	1.56683	1.03711	1.12503	1.4159
WEI-5-g4		608.9	1.2	0.282401	0.282806	0.282496	2.21575e-05	0.0015942	6.24949e-05	0.282477	-10.2307	0.784349	2.71297	0.784349	1.08036	1.3441
WEI-5-g5		608.9	1.2	0.282401	0.282806	0.282467	2.19531e-05	0.00184496	5.26289e-05	0.282445	-11.2604	0.777194	1.58031	0.777194	1.12947	1.41505
WEI-5-g6		608.9	1.2	0.282401	0.282806	0.282433	2.28352e-05	0.00199665	2.46526e-05	0.28241	-12.4427	0.808518	0.335045	0.808518	1.18227	1.49296
WEI-5-g7		608.9	1.2	0.282401	0.282806	0.282459	1.6387e-05	0.00133739	2.66912e-05	0.282444	-11.5236	0.580156	1.52225	0.580156	1.12477	1.41869
WEI-5-g8		608.9	1.2	0.282401	0.282806	0.282513	1.81537e-05	0.0012854	2.37012e-05	0.282498	-9.61303	0.64258	3.45649	0.64258	1.04677	1.29747
WEI-5-g9		608.9	1.2	0.282401	0.282806	0.282492	2.19292e-05	0.00183231	0.000213907	0.282471	-10.3568	0.776275	2.49027	0.776275	1.09241	1.35805
WEI-5-g10		608.9	1.2	0.282401	0.282806	0.28248	1.92848e-05	0.00158269	2.34604e-05	0.282462	-10.7807	0.682696	2.16686	0.682696	1.10221	1.37832
WEI-5-g11		608.9	1.2	0.282401	0.282806	0.28248	1.58655e-05	0.00105983	1.23886e-05	0.282468	-10.7953	0.561649	2.36398	0.561649	1.08757	1.36597
WEI-5-g12		608.9	1.2	0.282401	0.282806	0.282489	2.56133e-05	0.00137876	7.53677e-05	0.282474	-10.4504	0.906699	2.58021	0.906699	1.08297	1.35242
WEI-5-g13		608.9	1.2	0.282401	0.282806	0.282543	2.16111e-05	0.00112635	2.53653e-05	0.28253	-8.57068	0.764879	4.56465	0.764879	1.00077	1.22789
WEI-5-g14		608.9	1.2	0.282401	0.282806	0.282507	1.67853e-05	0.00101474	5.92344e-05	0.282495	-9.83267	0.594156	3.34613	0.594156	1.04802	1.30439
WEI-5-g15		608.9	1.2	0.282401	0.282806	0.28249	1.98556e-05	0.00142774	6.99191e-05	0.282474	-10.4143	0.702878	2.5965	0.702878	1.08294	1.3514
WEI-5-g16		608.9	1.2	0.282401	0.282806	0.282453	2.58142e-05	0.00188335	0.000100492	0.282432	-11.7359	0.91393	1.08862	0.91393	1.14996	1.44583
WEI-5-g17		608.9	1.2	0.282401	0.282806	0.282455	1.97867e-05	0.00148557	1.86708e-05	0.282438	-11.6735	0.700525	1.3122	0.700525	1.13525	1.43184
WEI-5-g18		608.9	1.2	0.282401	0.282806	0.282468	2.28475e-05	0.00188261	0.00013428	0.282447	-11.1925	0.808853	1.63309	0.808853	1.12786	1.41175
WEI-5-g19		608.9	1.2	0.282401	0.282806	0.282474	2.38232e-05	0.0013885	0.000101652	0.282458	-11.0072	0.843378	2.01869	0.843378	1.10559	1.3876
WEI-5-g20		608.9	1.2	0.282401	0.282806	0.282515	2.62007e-05	0.00155945	9.06292e-05	0.282497	-9.5576	0.92741	3.40105	0.92741	1.05221	1.30094
BOS29A2 Dedham Granite: 609.1 +/- 1.1 (42.2684°N, 71.1680°W)*
BOS29A2-g1		609.1	1.1	0.282401	0.282806	0.282487	2.95771e-05	0.00116069	6.53133e-05	0.282473	-10.549	1.04703	2.57411	1.04703	1.08065	1.35296
BOS29A2-g2		609.1	1.1	0.282401	0.282806	0.282495	2.92912e-05	0.00183354	5.23335e-05	0.282474	-10.2649	1.03688	2.58609	1.03688	1.08871	1.35221
BOS29A2-g3		609.1	1.1	0.282401	0.282806	0.282522	2.5702e-05	0.0014141	4.25902e-05	0.282505	-9.31774	0.909737	3.70439	0.909737	1.03849	1.28207
BOS29A2-g4		609.1	1.1	0.282401	0.282806	0.282492	2.29849e-05	0.00146166	2.3008e-05	0.282476	-10.3487	0.813648	2.6528	0.813648	1.08128	1.34802
BOS29A2-g5		609.1	1.1	0.282401	0.282806	0.282545	2.83071e-05	0.00151499	1.6486e-05	0.282528	-8.48699	1.00186	4.4954	1.00186	1.0078	1.2324
BOS29A2-g7		609.1	1.1	0.282401	0.282806	0.282469	2.72408e-05	0.00123992	5.04089e-05	0.282455	-11.165	0.964381	1.92511	0.964381	1.10754	1.39362
BOS29A2-g8		609.1	1.1	0.282401	0.282806	0.282478	2.26192e-05	0.00152856	6.73674e-05	0.282461	-10.8536	0.800741	2.12004	0.800741	1.10355	1.38141
BOS29A2-g9		609.1	1.1	0.282401	0.282806	0.282482	1.78622e-05	0.00191221	4.66673e-05	0.28246	-10.7294	0.632333	2.08904	0.632333	1.10993	1.38335
BOS29A2-g10		609.1	1.1	0.282401	0.282806	0.28249	2.73857e-05	0.00207198	0.00019045	0.282466	-10.4492	0.96944	2.30498	0.96944	1.10328	1.36982
BOS29A2-g11		609.1	1.1	0.282401	0.282806	0.282475	2.71179e-05	0.0015213	4.38356e-05	0.282457	-10.9707	0.960013	2.00571	0.960013	1.10805	1.38857
BOS29A2-g12		609.1	1.1	0.282401	0.282806	0.282475	2.37349e-05	0.00187978	6.98827e-05	0.282454	-10.95	0.840248	1.88127	0.840248	1.11792	1.39636
BOS29A2-g13		609.1	1.1	0.282401	0.282806	0.282483	2.26644e-05	0.00166105	3.51948e-05	0.282464	-10.6663	0.802326	2.25402	0.802326	1.0999	1.37302
BOS29A2-g14		609.1	1.1	0.282401	0.282806	0.282528	3.19912e-05	0.00170351	9.20622e-05	0.282508	-9.09713	1.13232	3.80809	1.13232	1.03763	1.27556
BOS29A2-g15		609.1	1.1	0.282401	0.282806	0.282497	4.07379e-05	0.00129497	0.000128801	0.282482	-10.1769	1.44207	2.89231	1.44207	1.06961	1.33301
BOS29A2-g17		609.1	1.1	0.282401	0.282806	0.282535	3.0099e-05	0.00161929	8.27441e-05	0.282517	-8.82855	1.06532	4.11114	1.06532	1.02443	1.25653
BOS29A2-g18		609.1	1.1	0.282401	0.282806	0.282457	2.69156e-05	0.00191042	0.000136181	0.282435	-11.6074	0.952909	1.21061	0.952909	1.14557	1.43835
BOS29A2-g19		609.1	1.1	0.282401	0.282806	0.282485	2.33741e-05	0.00112387	2.79884e-05	0.282473	-10.5947	0.827445	2.54327	0.827445	1.08142	1.35489
BOS29A2-g20		609.1	1.1	0.282401	0.282806	0.282465	3.09271e-05	0.00213701	9.11734e-05	0.28244	-11.3319	1.0949	1.39469	1.0949	1.14135	1.42683
BOS29A2-g21		609.1	1.1	0.282401	0.282806	0.282545	3.65985e-05	0.00275373	0.000210596	0.282513	-8.48917	1.29532	3.99156	1.29532	1.04243	1.26404
MT94-1 Dedham Granite: 609.5 +/- 1.1 (42.3141°N, 71.3386°W)*
MT-94-1-g1		609.5	1.1	0.2824	0.282806	0.282375	2.05246e-05	0.00102608	2.82945e-05	0.282364	-14.4815	0.726853	-1.30059	0.726853	1.23291	1.59558
MT-94-1-g2		609.5	1.1	0.2824	0.282806	0.282367	3.47437e-05	0.00118683	4.38176e-05	0.282353	-14.7838	1.23045	-1.66844	1.23045	1.25017	1.61852
MT-94-1-g3		609.5	1.1	0.2824	0.282806	0.282365	1.94468e-05	0.00126505	3.42492e-05	0.28235	-14.8601	0.688712	-1.7765	0.688712	1.2558	1.62526
MT-94-1-g4		609.5	1.1	0.2824	0.282806	0.282337	1.89203e-05	0.00106529	7.43942e-05	0.282325	-15.8476	0.670131	-2.68441	0.670131	1.28835	1.68185
MT-94-1-g5		609.5	1.1	0.2824	0.282806	0.282392	2.47144e-05	0.00180692	0.00017856	0.282371	-13.9007	0.875181	-1.03535	0.875181	1.23527	1.57903
MT-94-1-g6		609.5	1.1	0.2824	0.282806	0.282406	3.65265e-05	0.0014909	3.5982e-05	0.282389	-13.394	1.2934	-0.399963	1.2934	1.20453	1.53935
MT-94-1-g7		609.5	1.1	0.2824	0.282806	0.282367	3.01103e-05	0.00136806	8.43073e-05	0.282352	-14.7714	1.06635	-1.72948	1.06635	1.25569	1.62233
MT-94-1-g9		609.5	1.1	0.2824	0.282806	0.28242	3.19957e-05	0.00126254	4.08163e-05	0.282405	-12.919	1.13291	0.168217	1.13291	1.17828	1.50385
MT-94-1-g10		609.5	1.1	0.2824	0.282806	0.282398	4.24353e-05	0.00102873	0.00010605	0.282386	-13.7028	1.50268	-0.521856	1.50268	1.20212	1.54697
MT-94-1-g11		609.5	1.1	0.2824	0.282806	0.282351	2.57291e-05	0.001058	0.000104061	0.282339	-15.3391	0.911244	-2.17225	0.911244	1.26795	1.64994
MT-94-1-g12		609.5	1.1	0.2824	0.282806	0.282444	6.2821e-05	0.00226816	0.000350378	0.282418	-12.0435	2.22419	0.63739	2.22419	1.17463	1.47452
MT-94-1-g13		609.5	1.1	0.2824	0.282806	0.282358	3.05292e-05	0.000973314	2.1424e-05	0.282347	-15.0977	1.08122	-1.89618	1.08122	1.25558	1.63273
MT-94-1-g14		609.5	1.1	0.2824	0.282806	0.282395	2.14117e-05	0.000944581	8.28129e-05	0.282384	-13.7874	0.758218	-0.57252	0.758218	1.20281	1.55013
MT-94-1-g15		609.5	1.1	0.2824	0.282806	0.282374	2.76928e-05	0.00113071	1.33428e-05	0.282361	-14.5263	0.980711	-1.38782	0.980711	1.23809	1.60102
MT-94-1-g16		609.5	1.1	0.2824	0.282806	0.28234	3.10573e-05	0.00124093	2.38186e-05	0.282325	-15.749	1.1	-2.6568	1.1	1.29041	1.68013
MT-94-1-g17		609.5	1.1	0.2824	0.282806	0.282339	2.43566e-05	0.00132656	9.75837e-05	0.282324	-15.7658	0.862672	-2.70836	0.862672	1.29401	1.68334
MT-94-1-g18		609.5	1.1	0.2824	0.282806	0.282353	2.78094e-05	0.000962864	4.39022e-05	0.282342	-15.2895	0.984917	-2.08405	0.984917	1.26282	1.64444
MT-94-1-g19		609.5	1.1	0.2824	0.282806	0.282395	2.14388e-05	0.0016051	7.5477e-05	0.282376	-13.8082	0.759179	-0.860943	0.759179	1.22488	1.56814
MT-94-1-g20		609.5	1.1	0.2824	0.282806	0.282399	3.27906e-05	0.00147698	6.51109e-05	0.282383	-13.6349	1.16114	-0.635544	1.16114	1.21375	1.55407
MT-94-1-g21		609.5	1.1	0.2824	0.282806	0.282376	2.65016e-05	0.00109323	7.07306e-05	0.282363	-14.4783	0.938521	-1.32456	0.938521	1.23496	1.59707
MT-94-1-g22		609.5	1.1	0.2824	0.282806	0.282329	2.25199e-05	0.000787115	2.07104e-05	0.28232	-16.1264	0.797648	-2.85081	0.797648	1.28995	1.69222
BOS27 Milford Granite: 606.3+/-1.2 Ma (42.1595°N, 71.4982°W)*
BOS27-g1		606.3	1.2	0.282402	0.282808	0.282371	2.09667e-05	0.003158	6.57097e-05	0.282335	-14.6468	0.742524	-2.39515	0.742524	1.31309	1.66132
BOS27-g2		606.3	1.2	0.282402	0.282808	0.282387	2.11385e-05	0.00356684	4.86903e-05	0.282346	-14.0742	0.748565	-1.98655	0.748565	1.30393	1.63586
BOS27-g3		606.3	1.2	0.282402	0.282808	0.282368	2.47116e-05	0.00256819	0.000169006	0.282339	-14.7297	0.875154	-2.24046	0.875154	1.29529	1.65168
BOS27-g4		606.3	1.2	0.282402	0.282808	0.282372	2.6419e-05	0.00277854	0.000134124	0.28234	-14.6198	0.935612	-2.21513	0.935612	1.29824	1.65011
BOS27-g5		606.3	1.2	0.282402	0.282808	0.282372	2.68273e-05	0.00223931	9.56065e-05	0.282347	-14.6042	0.95007	-1.98221	0.95007	1.27858	1.63559
BOS27-g6		606.3	1.2	0.282402	0.282808	0.282409	2.29844e-05	0.0023835	5.34119e-05	0.282382	-13.3081	0.813869	-0.74245	0.813869	1.23035	1.55824
BOS27-g7		606.3	1.2	0.282402	0.282808	0.282363	2.2164e-05	0.00319649	4.13131e-05	0.282327	-14.9234	0.784948	-2.6877	0.784948	1.32612	1.67955
BOS27-g8		606.3	1.2	0.282402	0.282808	0.28242	2.11487e-05	0.00232412	0.000273029	0.282393	-12.9108	0.748839	-0.320678	0.748839	1.21205	1.5319
BOS27-g9		606.3	1.2	0.282402	0.282808	0.282365	2.04318e-05	0.00204932	0.000116092	0.282341	-14.862	0.723597	-2.16377	0.723597	1.2825	1.6469
BOS27-g10		606.3	1.2	0.282402	0.282808	0.282364	2.54582e-05	0.00314163	0.000126144	0.282328	-14.9024	0.90161	-2.64452	0.90161	1.32321	1.67686
BOS27-g11		606.3	1.2	0.282402	0.282808	0.282385	1.72428e-05	0.00251254	0.000113914	0.282356	-14.1565	0.610614	-1.64402	0.610614	1.26969	1.6145
BOS27-g12		606.3	1.2	0.282402	0.282808	0.282384	2.53963e-05	0.00197485	0.000205144	0.282362	-14.1639	0.89935	-1.43471	0.89935	1.25157	1.60144
BOS27-g13		606.3	1.2	0.282402	0.282808	0.282339	2.02227e-05	0.00218874	7.32334e-05	0.282314	-15.7749	0.716255	-3.13405	0.716255	1.32463	1.70735
BOS27-g14		606.3	1.2	0.282402	0.282808	0.282385	1.80045e-05	0.00166353	0.000169885	0.282366	-14.1444	0.637585	-1.28962	0.637585	1.24035	1.59239
BOS27-g15		606.3	1.2	0.282402	0.282808	0.28238	2.2796e-05	0.0028957	0.000160017	0.282347	-14.3309	0.807282	-1.97309	0.807282	1.29041	1.63502
BOS27-g16		606.3	1.2	0.282402	0.282808	0.282368	1.7696e-05	0.00331796	0.000217555	0.282331	-14.7324	0.626701	-2.54534	0.626701	1.32258	1.67068
BOS27-g17		606.3	1.2	0.282402	0.282808	0.282356	2.07219e-05	0.00293461	8.23186e-05	0.282322	-15.1756	0.733893	-2.83463	0.733893	1.32701	1.6887
BOS27-g18		606.3	1.2	0.282402	0.282808	0.282401	3.07947e-05	0.00211582	2.52797e-05	0.282376	-13.5963	1.09046	-0.923164	1.09046	1.23319	1.56952
BOS27-g19		606.3	1.2	0.282402	0.282808	0.282398	2.19629e-05	0.00162295	7.92444e-05	0.28238	-13.6818	0.777728	-0.810073	0.777728	1.22038	1.56246
BOS27-g20		606.3	1.2	0.282402	0.282808	0.282366	2.31194e-05	0.00237928	0.000312435	0.282339	-14.8094	0.818772	-2.24405	0.818772	1.29188	1.65191
BOS27-g21		606.3	1.2	0.282402	0.282808	0.282379	2.81685e-05	0.00305193	0.000248816	0.282344	-14.3725	0.997545	-2.07772	0.997545	1.29775	1.64154
MT-95-1 Lynn-Mattapan Volcanic Complex: 595.8 +/- 1.2 Ma (42.4894°N, 71.0458°W)*
MT-95-1-g1		596	1	0.282409	0.282816	0.282479	2.25426e-05	0.00178462	1.55857e-05	0.282459	-10.8255	0.798026	1.76581	0.798026	1.11003	1.39334
MT-95-1-g2		596	1	0.282409	0.282816	0.282471	3.85067e-05	0.00111669	0.000150605	0.282459	-11.1035	1.36321	1.7521	1.36321	1.10151	1.3942
MT-95-1-g3		596	1	0.282409	0.282816	0.282474	2.46452e-05	0.00158373	0.000240889	0.282457	-10.9867	0.872475	1.68403	0.872475	1.11056	1.39846
MT-95-1-g4		596	1	0.282409	0.282816	0.282547	2.93329e-05	0.00199015	0.000107653	0.282525	-8.41558	1.03816	4.0975	1.03816	1.01791	1.24714
MT-95-1-g5		596	1	0.282409	0.282816	0.282504	3.18792e-05	0.00239314	3.50315e-05	0.282477	-9.94536	1.12845	2.40601	1.12845	1.09224	1.35324
MT-95-1-g6		596	1	0.282409	0.282816	0.282508	3.54714e-05	0.00186774	6.69195e-05	0.282487	-9.80115	1.25559	2.75858	1.25559	1.0709	1.33114
MT-95-1-g7		596	1	0.282409	0.282816	0.282121	2.47681e-05	0.000508551	6.48474e-06	0.282116	-23.4665	0.877923	-10.3864	0.877923	1.5665	2.14893
MT-95-1-g8		596	1	0.282409	0.282816	0.282453	2.66724e-05	0.00155339	6.51931e-05	0.282436	-11.7303	0.944313	0.951429	0.944313	1.13961	1.44431
MT-95-1-g9		596	1	0.282409	0.282816	0.282481	2.39171e-05	0.00123807	0.000107384	0.282467	-10.7579	0.846679	2.05004	0.846679	1.09125	1.37554
MT-95-1-g10		596	1	0.282409	0.282816	0.282492	2.25751e-05	0.000683303	1.97568e-05	0.282484	-10.3599	0.799143	2.66843	0.799143	1.05975	1.33679
MT-KK10 Lynn-Mattapan Volcanic Complex: 566.0 +/- 1.4 Ma (42.2755°N, 71.2579°W)*
MT-KK10-g1		596	1	0.282409	0.282816	0.282515	2.69969e-05	0.00167949	9.17662e-05	0.282497	-9.5374	0.955589	3.09728	0.955589	1.05482	1.30991
MT-KK10-g2		596	1	0.282409	0.282816	0.282535	2.40984e-05	0.0015189	0.000232486	0.282518	-8.82481	0.852933	3.87445	0.852933	1.02158	1.26114
MT-KK10-g3		596	1	0.282409	0.282816	0.282517	2.57344e-05	0.000969165	0.000177226	0.282506	-9.49004	0.910898	3.42614	0.910898	1.0332	1.28928
MT-KK10-g4		596	1	0.282409	0.282816	0.282604	3.43981e-05	0.00271553	0.000178373	0.282573	-6.41561	1.21719	5.81273	1.21719	0.954983	1.13934
MT-KK10-g5		596	1	0.282409	0.282816	0.282555	2.89983e-05	0.00126358	0.000177565	0.282541	-8.13232	1.02629	4.66901	1.02629	0.986916	1.21124
MT-KK10-g6		596	1	0.282409	0.282816	0.282546	2.65696e-05	0.00127085	5.12631e-05	0.282532	-8.45327	0.940363	4.34475	0.940363	0.999964	1.23161
MT-KK10-g7		596	1	0.282409	0.282816	0.282555	2.19169e-05	0.000606839	1.709e-05	0.282548	-8.14726	0.77567	4.91427	0.77567	0.970573	1.19583
MT-KK10-g8		596	1	0.282409	0.282816	0.282536	3.30319e-05	0.00220867	0.000189071	0.282511	-8.80461	1.16912	3.62138	1.16912	1.03994	1.27703
MT-KK10-g9		596	1	0.282409	0.282816	0.282542	2.87388e-05	0.00125674	8.68645e-05	0.282528	-8.60599	1.01715	4.19743	1.01715	1.0057	1.24087
MT-KK10-g10		596	1	0.282409	0.282816	0.282595	3.51122e-05	0.00162436	0.000228349	0.282577	-6.71142	1.24249	5.94886	1.24249	0.938977	1.13077
MT01-28 Lynn-Mattapan Volcanic Complex: 597.4 +/- 1.5 Ma (42.3005°N, 71.1940°W )
MT01-28-g1		596	1	0.282409	0.282816	0.28256	3.92438e-05	0.00372013	0.000673011	0.282518	-7.97411	1.38887	3.85412	1.38887	1.04904	1.26242
MT01-28-g2		596	1	0.282409	0.282816	0.282548	3.2352e-05	0.00123381	7.14936e-05	0.282534	-8.39608	1.14501	4.4167	1.14501	0.996692	1.2271
MT01-28-g3		596	1	0.282409	0.282816	0.282518	2.53642e-05	0.00117729	3.94045e-05	0.282505	-9.43259	0.897788	3.4012	0.897788	1.0366	1.29084
MT01-28-g4		596	1	0.282409	0.282816	0.282537	2.47286e-05	0.000757531	1.38348e-05	0.282529	-8.76684	0.875235	4.23416	0.875235	0.998898	1.23856
MT01-28-g5		596	1	0.282409	0.282816	0.282572	2.8957e-05	0.000540235	1.48984e-05	0.282566	-7.53579	1.02477	5.55294	1.02477	0.944842	1.15568
MT01-28-g6		596	1	0.282409	0.282816	0.282543	2.96494e-05	0.00141869	0.000106798	0.282527	-8.57147	1.04938	4.16783	1.04938	1.00866	1.24273
MT01-28-g7		596	1	0.282409	0.282816	0.282574	1.9674e-05	0.00181472	0.000193928	0.282554	-7.44719	0.696242	5.13669	0.696242	0.97373	1.18185
MT01-28-g8		596	1	0.282409	0.282816	0.282546	3.38322e-05	0.00122391	4.52478e-05	0.282533	-8.43551	1.1974	4.38114	1.1974	0.998007	1.22933
MT01-28-g9		596	1	0.282409	0.282816	0.282562	3.08113e-05	0.00154056	5.63014e-05	0.282545	-7.8808	1.09042	4.81112	1.09042	0.984083	1.20232
MT01-28-g10		596	1	0.282409	0.282816	0.282545	2.56045e-05	0.00152023	2.96242e-05	0.282528	-8.50293	0.906212	4.19622	0.906212	1.00864	1.24094
MT01-28-g11		596	1	0.282409	0.282816	0.282561	3.04744e-05	0.00202389	5.53516e-05	0.282539	-7.90789	1.0785	4.5925	1.0785	0.998091	1.21605
WE7-1A Lynn-Mattapan Volcanic Complex: 595.7 +/-1.6 Ma (42.2673°N, 70.8704°W)*
WE7-1A-g1		596	1	0.282409	0.282816	0.28248	2.86012e-05	0.000646539	0.000124241	0.282473	-10.783	1.0125	2.25926	1.0125	1.07539	1.36244
WE7-1A-g2		596	1	0.282409	0.282816	0.28255	3.32411e-05	0.00168195	9.87926e-05	0.282532	-8.29748	1.17647	4.33787	1.17647	1.0047	1.23205
WE7-1A-g3		596	1	0.282409	0.282816	0.282558	3.48831e-05	0.00183039	5.39582e-05	0.282537	-8.04212	1.23455	4.53476	1.23455	0.998339	1.21968
WE7-1A-g4		596	1	0.282409	0.282816	0.282566	3.72884e-05	0.0020752	0.000202655	0.282543	-7.75119	1.31964	4.72908	1.31964	0.993067	1.20747
WE7-1A-g5		596	1	0.282409	0.282816	0.28254	3.62027e-05	0.00264602	7.9919e-05	0.28251	-8.66463	1.28133	3.58825	1.28133	1.04666	1.27911
WE7-1A-g6		596	1	0.282409	0.282816	0.282522	2.73573e-05	0.00201471	7.31626e-05	0.282499	-9.31473	0.968325	3.18742	0.968325	1.05531	1.30425
WE7-1A-g7		596	1	0.282409	0.282816	0.282523	3.27935e-05	0.00168893	0.000183168	0.282504	-9.25399	1.16074	3.37732	1.16074	1.04362	1.29234
WE7-1A-g8		596	1	0.282409	0.282816	0.282521	2.80936e-05	0.00133427	8.97904e-05	0.282506	-9.34536	0.994392	3.42635	0.994392	1.03743	1.28926
WE7-1A-g9		596	1	0.282409	0.282816	0.282488	2.69107e-05	0.00214204	7.53587e-05	0.282464	-10.5072	0.952631	1.94287	0.952631	1.10778	1.38226
WE7-1A-g10		596	1	0.282409	0.282816	0.282557	4.09731e-05	0.00155883	4.49141e-05	0.282539	-8.07175	1.45008	4.61268	1.45008	0.992275	1.21478
*Datum is NAD27
** Hf isotope crustal model ages are calculated using the 176Lu/177Hf of average continental crust (0.015) or a higher 176Lu/177Hf value (0.022) for mafic sources from:
Bouvier, A., Vervoort, J.D., and Patchett, P.J., 2008, The Lu-Hf and Sm-Nd isotopic composition of CHUR: Constraints from unequilibrated chondrites and implications
for the bulk composition of terrestrial planets: Earth and Planetary Science Letters, v. 273, p. 48–57, https://doi.org/10.1016/j.epsl.2008.06.010.

## Sheet: Info
This Supplemental Material accompanies
Thompson, M.D., Barr, S.M., and Pollock, J.C., 2022, Evolving views of West Avalonia: Perspectives from southeastern New England, USA,
New England, USA, in Kuiper, Y.D., Murphy, J.B., Nance, R.D., Strachan, R.A., and Thompson, M.D., eds., New Developments in
the Appalachian-Caledonian-Variscan Orogen: Geological Society of America Special Paper 554, https://doi.org/10.1130/2022.2554(03).
